# Supplementary material
Source: Royal Society of Chemistry journal article supplement (doi:10.1039/d6nj01015f)
Supplement: d6nj01015f1.pdf [file d6nj01015f1.pdf]

# Construction Inverse NiCoCeAl-LDO/Ni Catalyst for Effective CO<sub>2</sub> Methanation in Low Temperature

*Bin Wang<sup>a‡</sup>, Yanwei Cao<sup>a‡</sup>, Shenghua Zhu<sup>a</sup>, Fuchang Cheng<sup>a</sup>, Jiahao Xu<sup>a</sup>, Xiaoqian Ren<sup>a\*</sup>, and Jinhua Liang<sup>b\*</sup>*

<sup>a</sup> College of Chemical Engineering, Nanjing Tech University, Nanjing, 211816, China

<sup>b</sup> College of Biotechnology and Pharmaceutical Engineering, Nanjing Tech University, Nanjing, 211816, China

\*Corresponding Authors:

Xiaoqian Ren: College of Chemical Engineering, Nanjing Tech University, Nanjing, Jiangsu 211816, China

E-mail address: xqren@njtech.edu.cn (X. Ren)

Jinhua Liang: College of Biotechnology and Pharmaceutical Engineering, Nanjing Tech University, Nanjing, Jiangsu 211816, China

E-mail address: jhliang@njtech.edu.cn (J. Liang)

### **Synthesis of CoCeAl-LDO**

3.28 g  $\text{Co}(\text{NO}_3)_2 \cdot 6\text{H}_2\text{O}$  (11.2 mmol), 1.22 g  $\text{Ce}(\text{NO}_3)_3 \cdot 6\text{H}_2\text{O}$  (2.80 mmol) and 1.05 g  $\text{Al}(\text{NO}_3)_3 \cdot 9\text{H}_2\text{O}$  (2.79 mmol) were dissolved in 50 mL deionized water to obtain solution C. 1.19 g  $\text{Na}_2\text{CO}_3$  (11.20 mmol) and 1.07 g  $\text{NaOH}$  (26.70 mmol) were dissolved in 50 mL deionized water to obtain solution D. Then solution C and solution D were simultaneously dropped into a three-necked flask using a peristaltic pump, maintaining a pH of 9-10 at 60 °C, followed by aging at 60 °C for 12 h. The mixed solution was cooled to room temperature, filtered, washed with deionized water and alcohol. Subsequently, dried at 60 °C for 24 h, denoted as CoCeAl-LDH. The CoCeAl-LDH were calcinated at 500 °C in a muffle furnace for 3 h, denoted as CoCeAl-LDO. The obtained sample was reduced in  $\text{H}_2$  at 400 °C for 3 h to obtain the final catalyst, denoted as CoCeAl-LDO-R

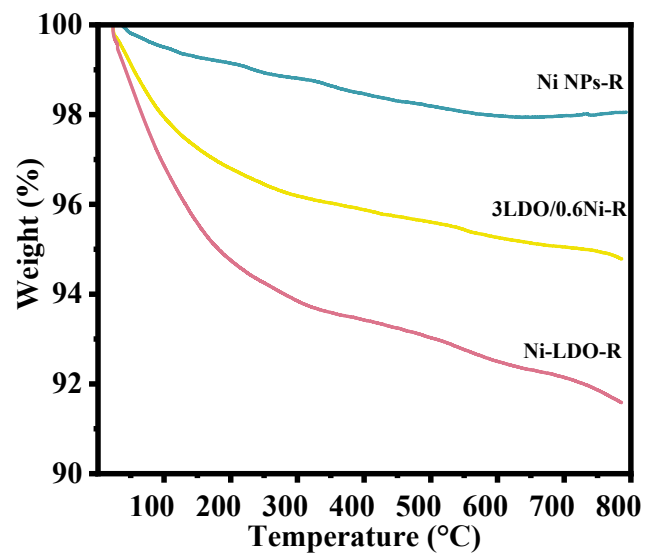

Fig. S1 TG profiles of the catalysts.

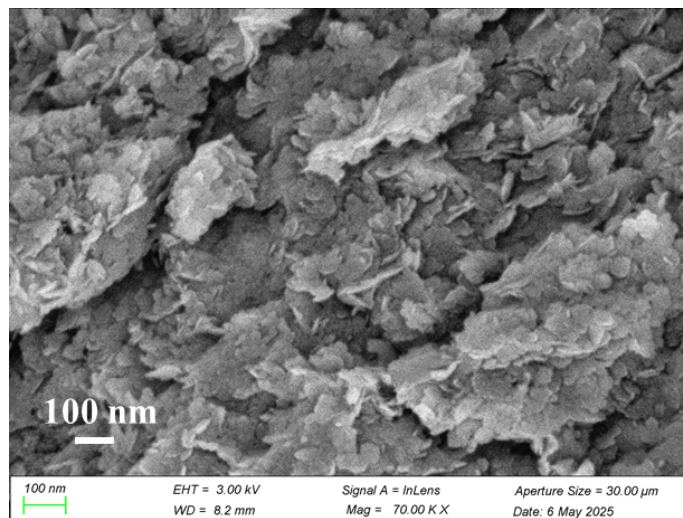

**Fig. S2.** SEM images of Ni(OH)<sub>2</sub>.

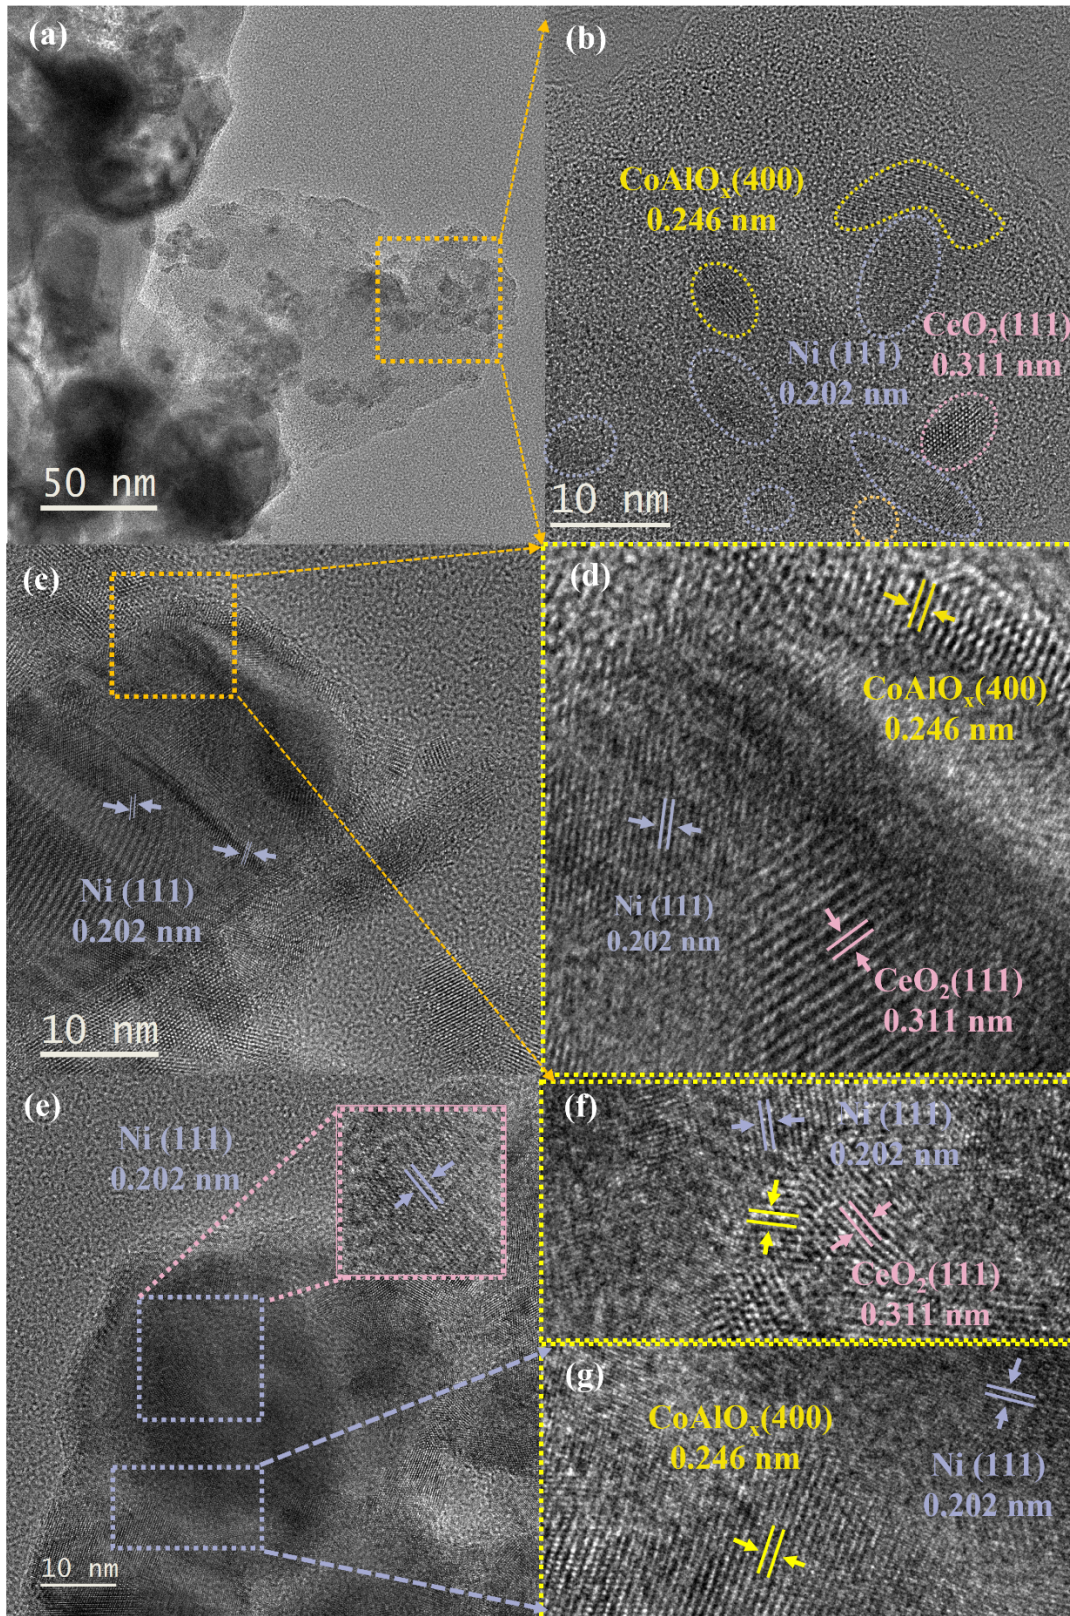

Fig. S3 (a-f) TEM and HRTEM images of 3LDO/0.6Ni-R.

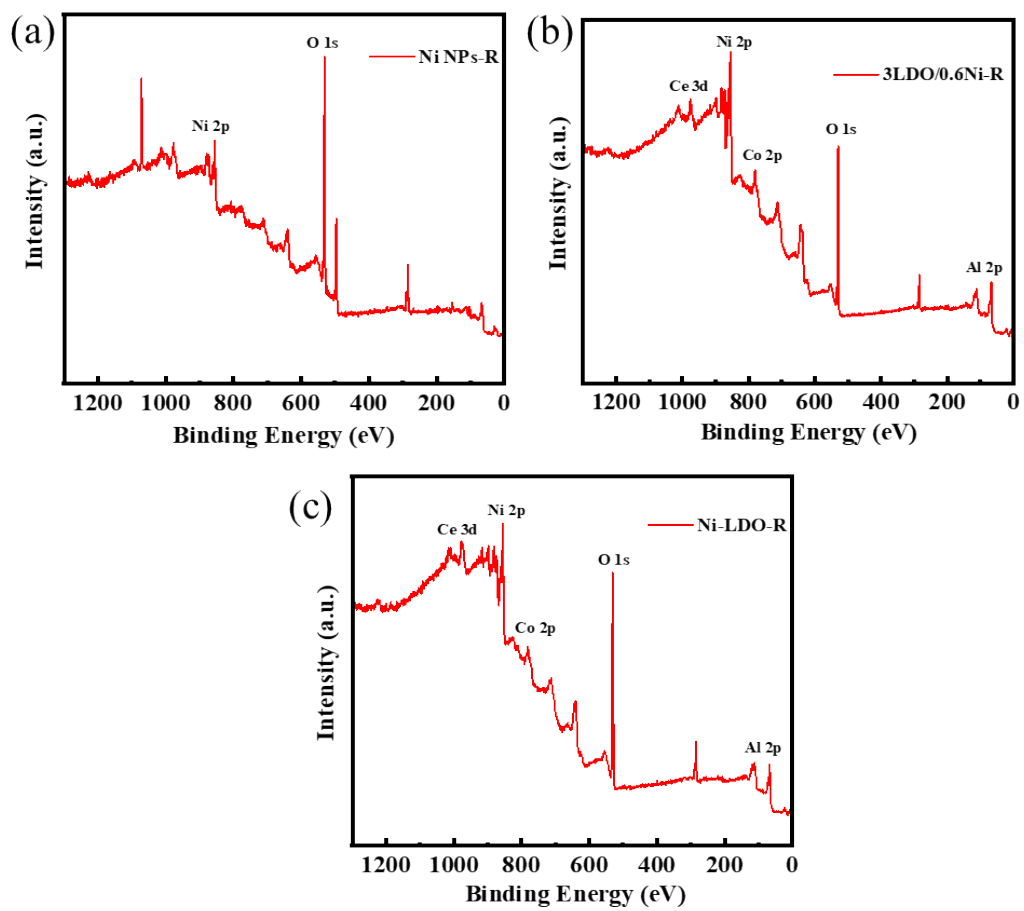

Fig. S4 XPS survey spectra of the catalysts.

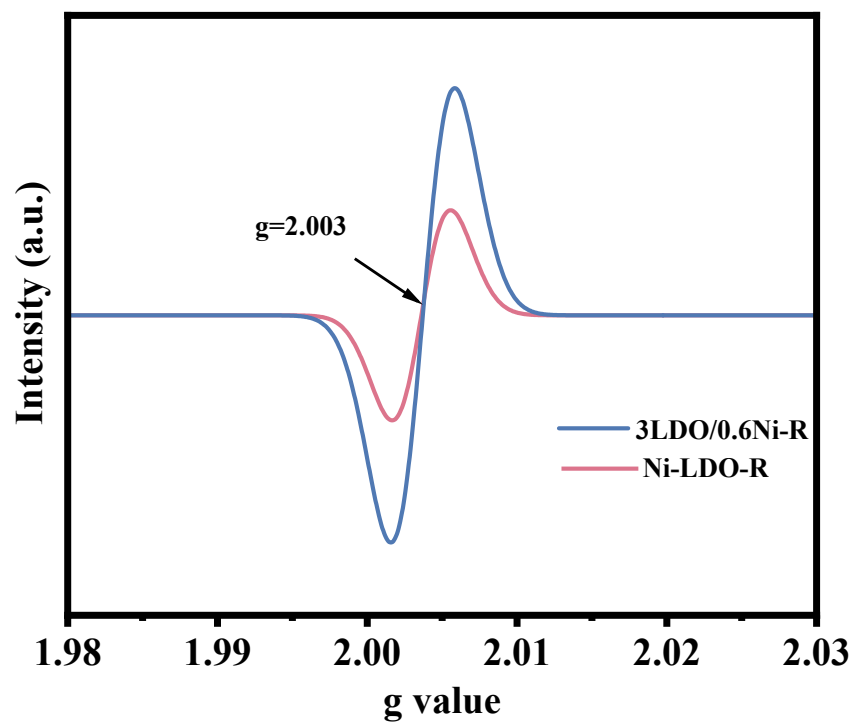

Fig. S5 EPR signals of LDO/0.6Ni-R and Ni-LDO-R samples.

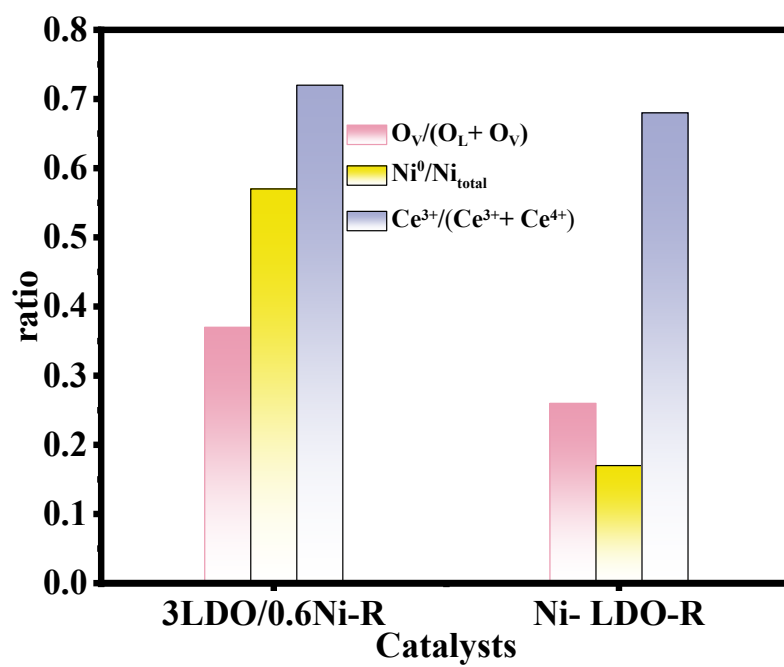

**Fig. S6** The ratios of  $O_v/(O_L + O_v)$ ,  $Ni^0/Ni_{total}$ , and  $Ce^{3+}/(Ce^{3+} + Ce^{4+})$  for LDO/0.6Ni-R and Ni-LDO-R samples.

**Tab. S1** The compositions of the catalysts

| Catalysts    |             | Ni loading (wt %) | Co loading (wt %) | Ce loading (wt %) | Al loading (wt %) |
|--------------|-------------|-------------------|-------------------|-------------------|-------------------|
| 3LDO/0.6Ni-R | Actual      | 58.55             | 4.53              | 11.11             | 2.15              |
|              | Theoretical | 60.05             | 4.81              | 11.42             | 2.20              |
| Ni- LDO-R    | Actual      | 31.59             | 10.41             | 24.63             | 4.55              |
|              | Theoretical | 34.12             | 11.46             | 26.24             | 5.24              |

Obtained based on the ICP-OES results.

**Tab. S2** The carbon equilibrium data of the catalysts sample under the conditions of 260 °C, 2 MPa, and WHSV=15000 mL·g<sup>-1</sup>·h<sup>-1</sup>.

| Catalysts    | V <sub>CO<sub>2</sub>, in</sub><br>(mL·min <sup>-1</sup> ) | V <sub>CO<sub>2</sub>, out</sub><br>(mL·min <sup>-1</sup> ) | V <sub>CH<sub>4</sub>, out</sub><br>(mL·min <sup>-1</sup> ) | Carbon balance<br>coefficient |
|--------------|------------------------------------------------------------|-------------------------------------------------------------|-------------------------------------------------------------|-------------------------------|
| Ni NPs-R     | 27.00                                                      | 25.52                                                       | 1.12                                                        | 0.98                          |
| 3LDO/0.6Ni-R | 27.00                                                      | 0.77                                                        | 26.05                                                       | 0.99                          |
| Ni-LDO-R     | 27.00                                                      | 6.52                                                        | 20.45                                                       | 0.99                          |

Note: V<sub>CO<sub>2</sub>, out</sub> and V<sub>CH<sub>4</sub>, out</sub> are calculated based on the exhaust gas flow rate at the outlet and the concentrations of each component in the GC.

$$\text{Carbon balance coefficient} = \frac{V_{CO_2, out} + V_{CH_4, out}}{V_{CO_2, in}}$$

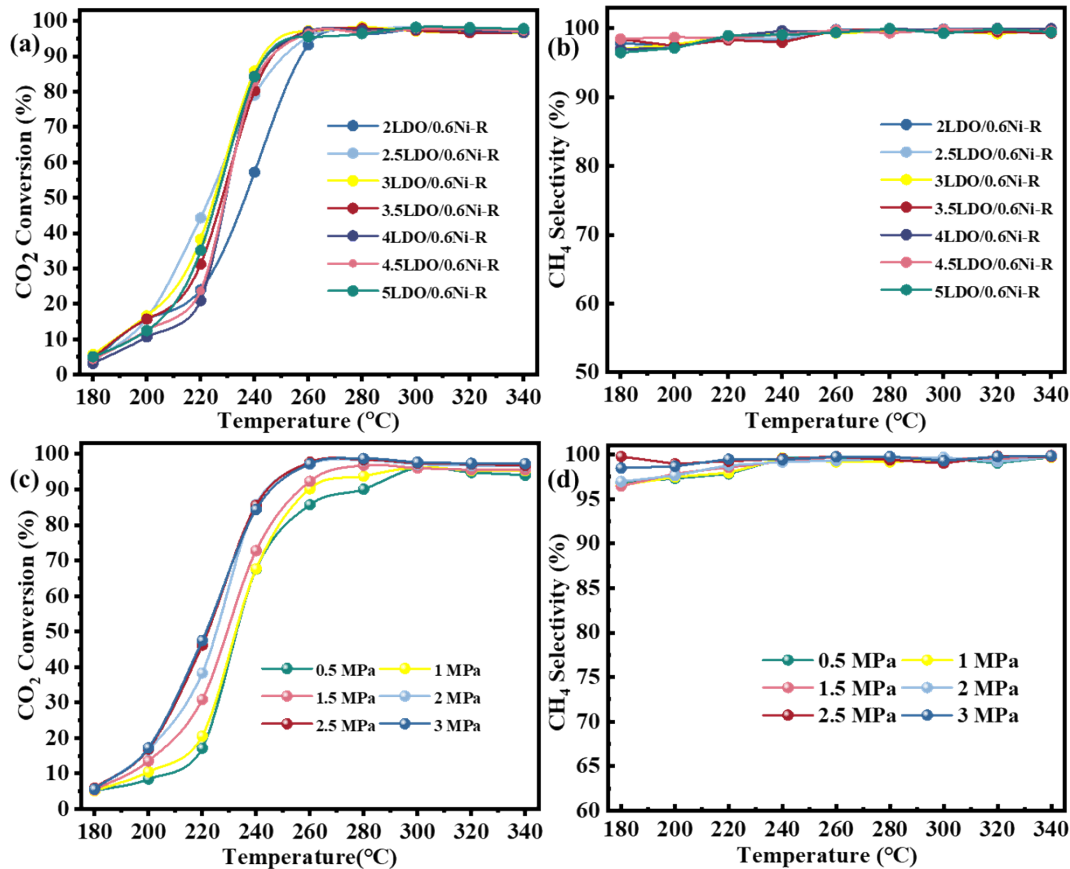

**Fig. S7** The effect of different Ni:Co:Ce:Al mole ratio of LDO on (a) CO<sub>2</sub> conversion and (b) CH<sub>4</sub> selectivity; the effect of different pressure on (c) CO<sub>2</sub> conversion and (d) CH<sub>4</sub> selectivity over 3LDO/0.6Ni-R at various reaction temperature.

Note: y is the mole ratio of Ni:Co:Ce:Al = y:1:1:1 in LDO.

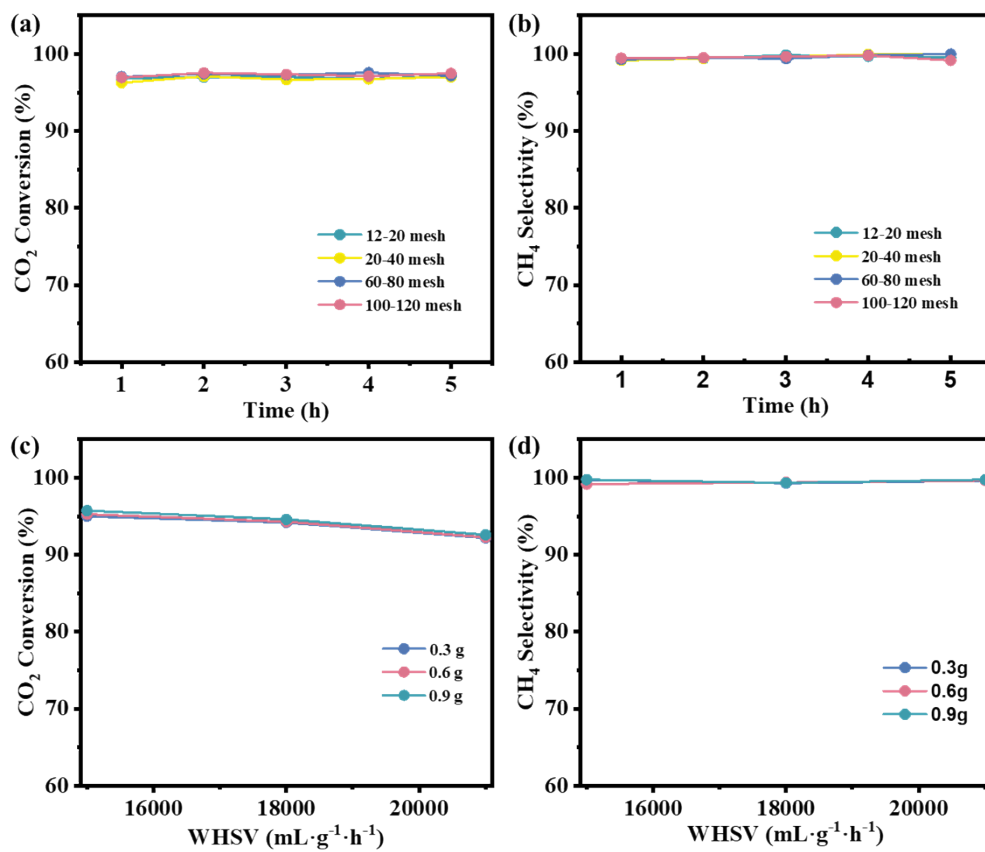

**Fig. S8** (a-b) CO<sub>2</sub> conversion and CH<sub>4</sub> selectivity over catalysts with different particle sizes. (2 MPa, 260 °C, H<sub>2</sub>/CO<sub>2</sub> mole ratio of 4:1, WHSV=15000 mL·g<sup>-1</sup>·h<sup>-1</sup>); (c-d) CO<sub>2</sub> conversion and CH<sub>4</sub> selectivity over catalysts with different catalyst quantity and different WHSV. (2 MPa, H<sub>2</sub>/CO<sub>2</sub> mole ratio of 4:1, 260 °C, 20-40 mesh)

**Tab. S3** Conversion and  $R_{CO_2}$  over various reaction temperature

| Temperature (°C) | Conversion (%) |          | $R_{CO_2}$ (mol/g·h) |          |
|------------------|----------------|----------|----------------------|----------|
|                  | 3LDO/0.6Ni-R   | Ni-LDO-R | 3LDO/0.6Ni-R         | Ni-LDO-R |
| 220              | 38.27          | 22.93    | 0.047                | 0.027    |
| 230              | 60.55          | 40.14    | 0.074                | 0.048    |
| 240              | 82.51          | 54.18    | 0.099                | 0.068    |
| 250              | 94.75          | 67.96    | 0.114                | 0.082    |

**Tab. S4** Comparison of catalysts performance of CO<sub>2</sub> methanation over different catalysts in the literature.

| Catalyst                                                       | H <sub>2</sub> /CO <sub>2</sub> | CO <sub>2</sub> Con.<br>(%) | WSHV<br>(mL·g <sub>cat</sub> <sup>-1</sup> ·h <sup>-1</sup> ) | Temperature (°C) | Ref.      |
|----------------------------------------------------------------|---------------------------------|-----------------------------|---------------------------------------------------------------|------------------|-----------|
| 3LDO/0.6Ni-R                                                   | 4:1                             | 97.2                        | 15000                                                         | 260              | This work |
| NiZrAl-LDH                                                     | 4:1                             | 93.3                        | 15000                                                         | 310              | 1         |
| 5Ni/NPs                                                        | 4:1                             | 85.0                        | 12000                                                         | 350              | 2         |
| Co <sub>3</sub> O <sub>4</sub> -Al <sub>2</sub> O <sub>3</sub> | 3:1                             | 42.5                        | 8000                                                          | 250              | 3         |
| Ru/CeO <sub>2</sub>                                            | 4:1                             | 86.0                        | 36000                                                         | 300              | 4         |
| Co (3)-N/CA2                                                   | 4:1                             | 83.1                        | 18000                                                         | 450              | 5         |
| Ni15C10                                                        | 4:1                             | 62.1                        | 21500                                                         | 375              | 6         |
| 0.16Ni/0.15Co/CeO <sub>2</sub>                                 | 4:1                             | 84.3                        | 11000                                                         | 300              | 7         |
| 3Mg10Ni5Co/MS                                                  | 4:1                             | 72.0                        | 12000                                                         | 400              | 8         |
| NiCe EISA                                                      | 4:1                             | 68.5                        | 15000                                                         | 300              | 9         |
| 13Ni5MgO-BEA                                                   | 4:1                             | 78.0                        | 7500                                                          | 350              | 10        |

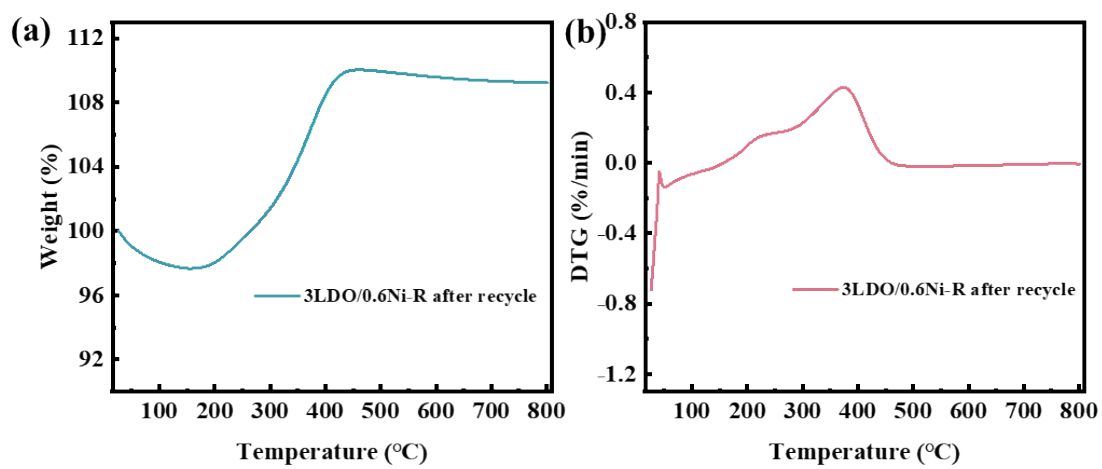

**Fig. S9** (a) TG and (b) DTG spectra of 3LDO/0.6Ni-R after recycle in air atmosphere

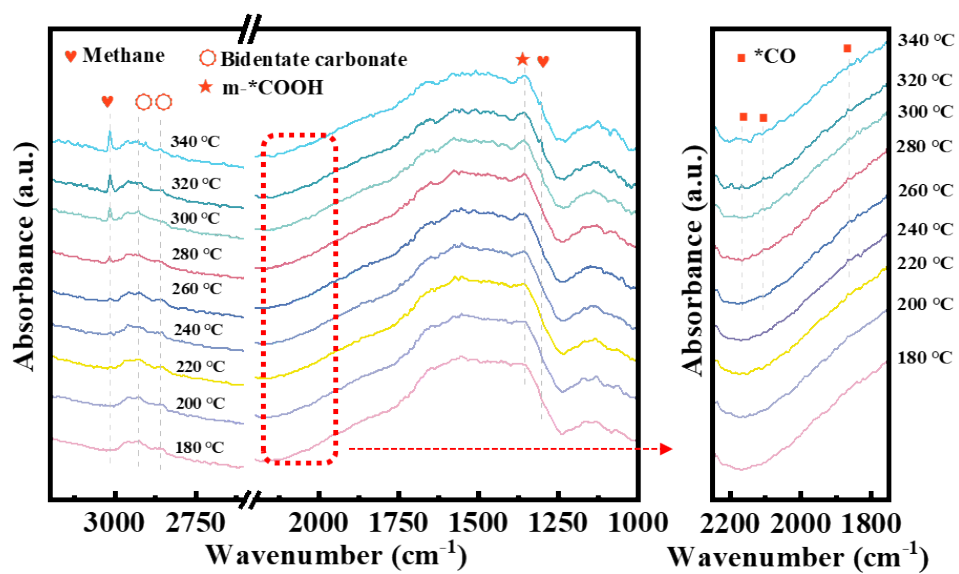

**Fig. S10** DRIFTS spectra recorded at different temperature in 72% H<sub>2</sub>/18% CO<sub>2</sub>/10% N<sub>2</sub> on 3LDO/0.6Ni.(1800-2200 cm<sup>-1</sup>)

**Tab. S5** Infrared band assignments of the surface species for CO<sub>2</sub> methanation.<sup>1,11-15</sup>

| Wavenumber (cm <sup>-1</sup> ) | Surface species       |
|--------------------------------|-----------------------|
| 1511                           | monodentate carbonate |
| 1584                           | bidentate carbonate   |
| 1370                           | monodentate formate   |
| 1548                           | bidentate formate     |
| 2850, 2923                     | methoxy               |
| 1306, 3012                     | methane               |
| 1733, 1740                     | formyl                |
| 1863, 2105, 2168               | carbonyl              |

## Notes and references

- 1 F. He, J. Zhuang, B. Lu, X. Liu, J. Zhang, F. Gu, M. Zhu, J. Xu, Z. Zhong, G. Xu and F. Su, *Fuel*, 2021, **293**, 120218.
- 2 Y. Bian, C. Xu, X. Wen, L. Xu, Y. Cui, S. Wang, C. Wu, J. Qiu, G. Cheng and M. Chen, *Fuel*, 2023, **331**, 125755.
- 3 Y. M. Park, B. G. Kim, X. Gao, X. Zhang, H.-S. Roh, C.-H. Chung and J. W. Bae, *Fuel*, 2023, **343**, 127943.
- 4 C. Wang, H. Sun, X. Liu, X. Jin, Y. Feng, H. Shi, D. Wang, Y. Zhang, Y. Wang and Z. Yan, *Fuel*, 2023, **345**, 128238.
- 5 A. R. Nobakht, M. Rezaei, S. M. Alavi, E. Akbari and M. Varbar, *J. CO<sub>2</sub> Util.*, 2023, **75**, 102577.
- 6 G. De Piano, J. J. Andrade Gamboa, A. M. Condó and F. C. Gennari, *Int. J. Hydrogen Energy*, 2024, **56**, 1007–1019.
- 7 C. Byron, Y. L. Kim, J. T. Bryant, J. N. Hall, T. Zhou, J. Wen, C. Liu, M. Delferro and M. S. Ferrandon, *ACS Appl. Mater. Interfaces*, 2025, **17**, 29695–29707.
- 8 G. Theochari, I. Trendafilova, B. Mladenov, D. Kovacheva, D. Karashanova, G. Atanasova, V. Mitova and M. Popova, *Catal. Today*, 2025, **459**, 115405.
- 9 C. Feng, H. Jiang, L. Wang and G. Yang, *J. Environ. Chem. Eng.*, 2025, **13**, 119302.
- 10 G. A. Nasser, A. I. Bakare, M. A. Sanhoob and J. Kopyscinski, *Catal. Today*, 2026, **462**, 115572.
- 11 X. Tang, C. Song, H. Li, W. Liu, X. Hu, Q. Chen, H. Lu, S. Yao, X. Li and L. Lin, *Nat Commun*, 2024, **15**, 3115.
- 12 Z. Li, J. Chen, Y. Xie, J. Wen, H. Weng, M. Wang, J. Zhang, J. Cao, G. Tian, Q. Zhang and P. Ning, *J. Energy Chem.*, 2024, **91**, 213–225.
- 13 Y. Pan, X. Han, X. Chang, H. Zhang, X. Zi, Z. Hao, J. Chen, Z. Lin, M. Li and X. Ma, *Ind. Eng. Chem. Res.*, 2023, **62**, 4344–4355.
- 14 T. Zhang, W. Wang, F. Gu, W. Xu, J. Zhang, Z. Li, T. Zhu, G. Xu, Z. Zhong and F. Su, *Appl. Catal., B*, 2022, **312**, 121385.
- 15 C. Dang, J. Zhou, H. Xia and W. Cai, *J. Mater. Chem. A*, 2024, **12**, 8281–8290.
